# Supplementary material for: Selumetinib-based therapy in uveal melanoma patient-derived xenografts
Source: PubMed Central journal article supplement (PMC5955168; doi:10.18632/oncotarget.24670), 2018-04-24
Supplement: oncotarget-09-21674-s001.pdf [file oncotarget-09-21674-s001.pdf]

## Selumetinib-based therapy in uveal melanoma patient-derived xenografts

### SUPPLEMENTARY MATERIALS

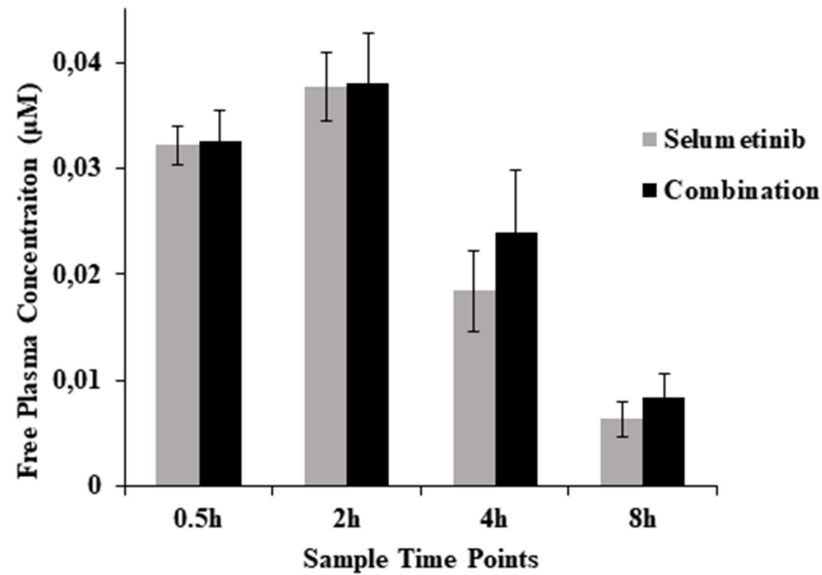

Supplementary Figure 1: *In vivo* pharmacokinetics of selumetinib administered alone or in combination with DTIC.

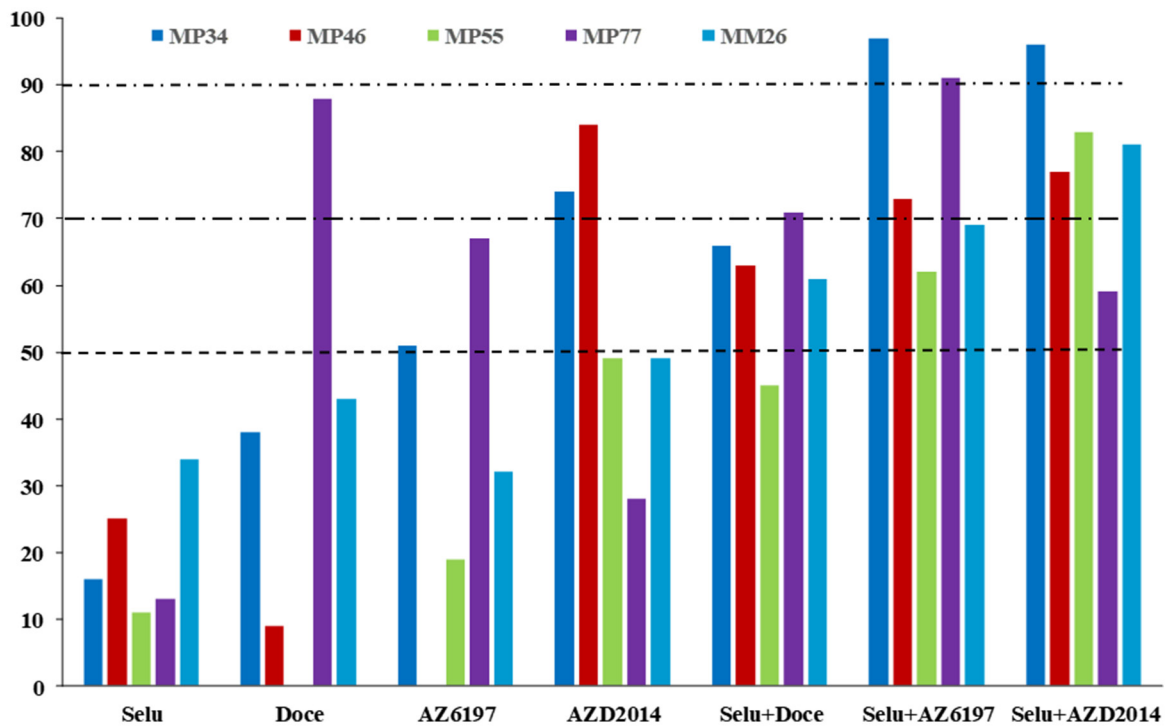

Supplementary Figure 2: Overall responses to new selumetinib-based combinations.

Supplementary Table 1: *In vivo* efficacy of targeted therapies administered alone

| All PDXs (%)     | Treatments  |           |        |         |
|------------------|-------------|-----------|--------|---------|
|                  | Selumetinib | Docetaxel | AZ6197 | AZD2014 |
| RTV $\leq 1$     | 0           | 0         | 0      | 0       |
| ORR $\leq -0.5$  | 0           | 20        | 40     | 40      |
| ORR $\leq -0.75$ | 0           | 20        | 0      | 20      |
| mPFS (days)      | 11          | 10        | 12     | 23      |

Abbreviations: RTV, Relative Tumor Volume; ORR, Overall Response Rate; mPFS, median of progression-free survival.

**Supplementary Table 2: *In vivo* efficacy score for targeted therapies administered alone or in combinations with Selumetinib**

| Treatments                               |                    | MP42 | MP46 | MP55 | MP77 | MM26 | Total     |
|------------------------------------------|--------------------|------|------|------|------|------|-----------|
| <b>4 monotherapies</b><br>(score 1 to 4) | <b>Selumetinib</b> | 4    | 2    | 3    | 4    | 3    | <b>16</b> |
|                                          | <b>Docetaxel</b>   | 3    | 4    | 4    | 1    | 2    | <b>14</b> |
|                                          | <b>AZ6197</b>      | 2    | 3    | 2    | 2    | 4    | <b>13</b> |
|                                          | <b>AZD2014</b>     | 1    | 1    | 1    | 3    | 1    | <b>7</b>  |
| <b>3 combinations</b><br>(score 1 to 3)  | <b>S + D</b>       | 2    | 3    | 3    | 2    | 3    | <b>13</b> |
|                                          | <b>S + AZ6197</b>  | 1    | 2    | 2    | 1    | 2    | <b>8</b>  |
|                                          | <b>S + AZD2014</b> | 3    | 1    | 1    | 3    | 1    | <b>9</b>  |
| <b>7 treatments</b><br>(score 1 to 7)    | <b>Selumetinib</b> | 7    | 5    | 6    | 7    | 6    | <b>31</b> |
|                                          | <b>Docetaxel</b>   | 6    | 6    | 7    | 2    | 5    | <b>26</b> |
|                                          | <b>AZ6197</b>      | 5    | 7    | 5    | 4    | 7    | <b>28</b> |
|                                          | <b>AZD2014</b>     | 2    | 1    | 3    | 6    | 4    | <b>16</b> |
|                                          | <b>S + D</b>       | 3    | 4    | 4    | 3    | 3    | <b>17</b> |
|                                          | <b>S + AZ6197</b>  | 1    | 3    | 2    | 1    | 2    | <b>9</b>  |
|                                          | <b>S + AZD2014</b> | 4    | 2    | 1    | 5    | 1    | <b>13</b> |

Abbreviations: S, selumetinib; D, docetaxel.

**Supplementary Table 3: *In vivo* efficacy of selumetinib-based combinations**

| All PDXs<br>(%)    | Treatments |            |             |
|--------------------|------------|------------|-------------|
|                    | S + D      | S + AZ6197 | S + AZD2014 |
| <b>RTV ≤ 1</b>     | 0          | 20         | 0           |
| <b>ORR ≤ -0.5</b>  | 80         | 100        | 100         |
| <b>ORR ≤ -0.75</b> | 0          | 40         | 60          |
| <b>mPFS (days)</b> | 16         | 22         | 16          |

**Supplementary Table 4: Characteristics of UM cell lines**

| Cell lines | Tumor sample origin | Morphology | LOH of chromosome 3 | <i>BAP1</i> mutations | <i>BAP1</i> Protein production <sup>3</sup> | <i>GNAQ</i> mutations | <i>GNAI1</i> mutations | <i>SF3B1</i> Mutations |
|------------|---------------------|------------|---------------------|-----------------------|---------------------------------------------|-----------------------|------------------------|------------------------|
| MP38       | Patient (eye)       | S          | Yes <sup>1</sup>    | Yes                   | No                                          | Yes                   | No                     | No                     |
| MP41       | PDX (eye)           | E          | Yes <sup>2</sup>    | No                    | Yes                                         | No                    | Yes                    | No                     |
| MP46       | PDX (eye)           | M          | Yes                 | No                    | No                                          | Yes                   | No                     | No                     |
| MP65       | Patient (eye)       | S          | Yes                 | Yes                   | No                                          | No                    | Yes                    | No                     |
| MM28       | PDX (liver)         | M          | Yes <sup>1</sup>    | Yes                   | No                                          | No                    | Yes                    | No                     |
| MM66       | PDX (liver)         | M          | No                  | No                    | Yes                                         | No                    | Yes                    | No                     |

Abbreviations: S, spindle cells; M, mixed cells; E, epithelioid cells.

<sup>1</sup>Uniparental disomy of 3q.

<sup>2</sup> Uniparental disomy of chromosome 3.

<sup>3</sup> as determined by Western blotting and Immunohistochemistry.

**Supplementary Table 5: Characteristics of UM PDXs**

| Cell lines | Tumor sample origin | Morphology | LOH of chromosome 3 | <i>BAP1</i> mutations | <i>BAP1</i> Protein production <sup>3</sup> | <i>GNAQ</i> mutations | <i>GNAI1</i> mutations | <i>SF3B1</i> Mutations |
|------------|---------------------|------------|---------------------|-----------------------|---------------------------------------------|-----------------------|------------------------|------------------------|
| MP34       | Eye                 | E          | Yes <sup>1</sup>    | No                    | Yes                                         | No                    | Yes                    | Yes                    |
| MP46       | Eye                 | M          | Yes                 | No <sup>3</sup>       | No                                          | Yes                   | No                     | No                     |
| MP55       | Eye                 | E          | Yes                 | Yes                   | No                                          | Yes                   | No                     | No                     |
| MP77       | Eye                 | E          | Yes                 | No                    | Yes                                         | No                    | Yes                    | No                     |
| MM26       | Liver               | E          | Yes                 | No                    | Yes                                         | Yes                   | No                     | Yes                    |

Abbreviations: S, spindle cells; M, mixed cells; E, epithelioid cells.

<sup>1</sup>Uniparental disomy of 3q.

<sup>2</sup> As determined by Western blotting and Immunohistochemistry.

<sup>3</sup> Mutation in promoter.

**Supplementary Table 6: Density of cell lines in viability tests *in vitro***

| Cell lines | number of cells/well |
|------------|----------------------|
| MP38       | 8000                 |
| MP65       | 8000                 |
| xMP41      | 2000                 |
| xMP46      | 7000                 |
| xMM28      | 5000                 |
| xMM66      | 6000                 |

**Supplementary Table 7: Mass Spectrometer and UPLC system parameters**

|                          |                                                     |            |           |
|--------------------------|-----------------------------------------------------|------------|-----------|
| <b>Mass Spectrometer</b> | Waters Xevo TQS                                     |            |           |
| <b>UPLC system</b>       | Water s Acquity i-Class                             |            |           |
| <b>Column</b>            | Phenomenex Kinetix C18 50 x 2.1 x 1.7 $\mu$ m       |            |           |
| <b>Solvent A</b>         | 95% (v/v) Water, 5% Methanol + 0.1% Formic acid     |            |           |
| <b>Solvent B</b>         | 95% MeOH, 5% Water + 0.1 % Formic acid              |            |           |
| <b>Elution Gradient</b>  | Time (min)                                          | <b>% A</b> | <b>%B</b> |
|                          | 0                                                   | 95         | 5         |
|                          | 0.3                                                 | 95         | 5         |
|                          | 2.2                                                 | 5          | 95        |
|                          | 2.6                                                 | 5          | 95        |
|                          | 2.61                                                | 95         | 5         |
|                          | 2.8                                                 | 95         | 5         |
| <b>Flow</b>              | 0.6 mL/min                                          |            |           |
| <b>Run time</b>          | 2.8 min, use a divert valve for initial 0.5 minutes |            |           |

**Supplementary Table 8: Optimization parameters for mass spectrometry analysis**

| <b>Compound</b> | <b>Ionization mode</b> | <b>Polarity</b> | <b>Parent ion</b> | <b>Daughter ion</b> | <b>Cone voltage (v)</b> | <b>Collison Energy</b> | <b>Retention Time (min)</b> |
|-----------------|------------------------|-----------------|-------------------|---------------------|-------------------------|------------------------|-----------------------------|
| Selumetinib     | ESI                    | Positive        | 459.155           | 396.846             | 60                      | 22                     | 1.71                        |
| AZ10024306      | ESI                    | Positive        | 408.064           | 174.241             | 60                      | 22                     | 1.53                        |
